# Supplementary material for: Ca2+/calmodulin-dependent protein kinase IIγ enhances stem-like traits and tumorigenicity of lung cancer cells
Source: PubMed Central journal article supplement (PMC4599257; doi:10.18632/oncotarget.3866), 2015-04-19
Supplement: oncotarget-06-16069-s001.pdf [file oncotarget-06-16069-s001.pdf]

# Ca<sup>2+</sup>/calmodulin-dependent protein kinase II $\gamma$ enhances stem-like traits and tumorigenicity of lung cancer cells

## Supplementary Material

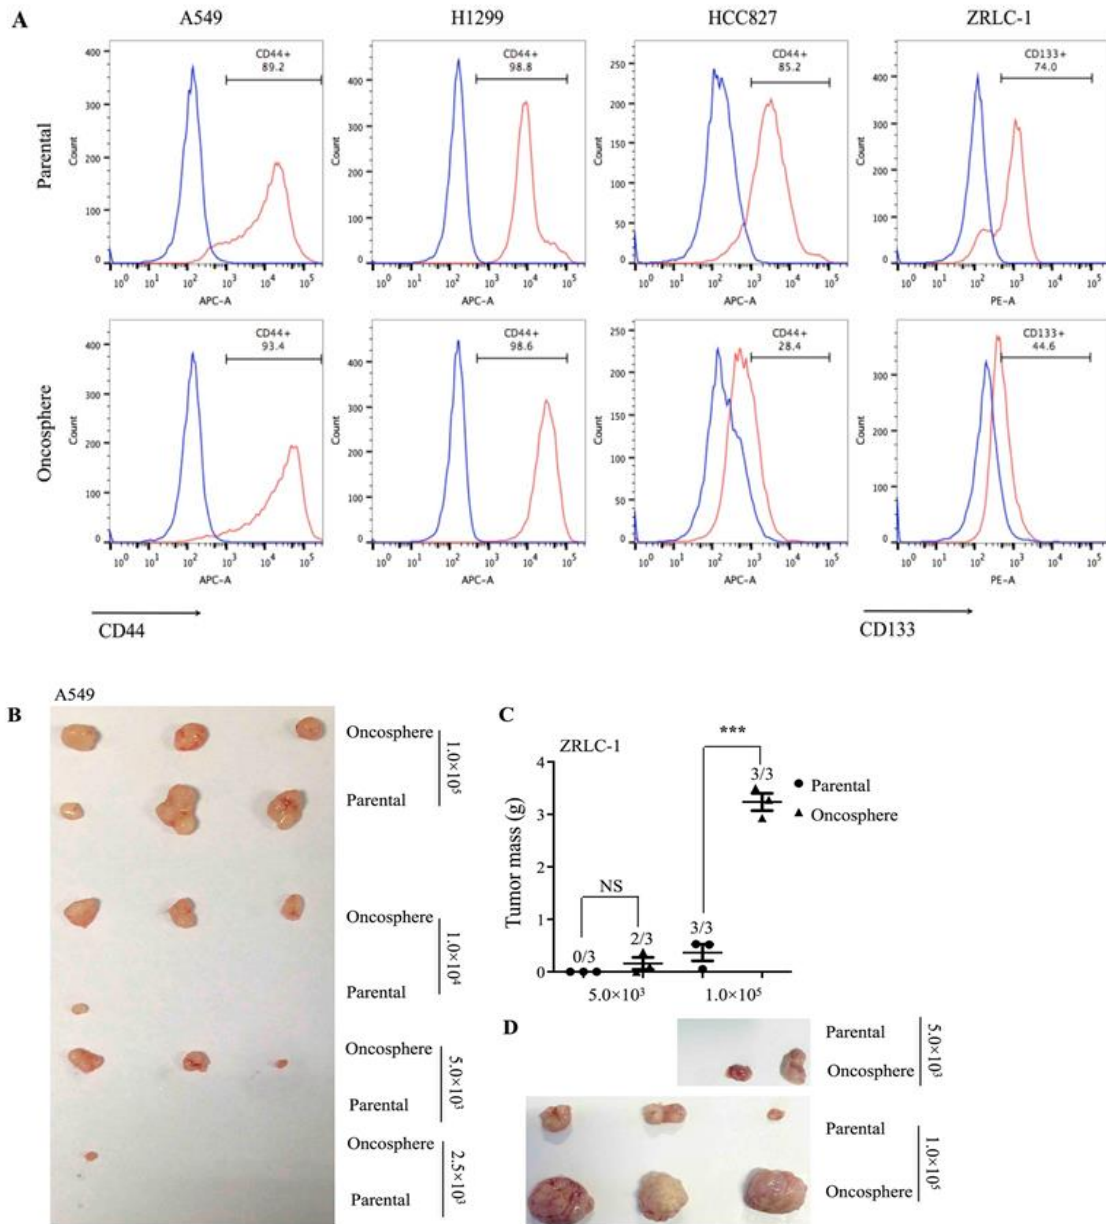

Fig.S1

(A) Representative histogram of CD44 or CD133 expression and quantification of CD44<sup>+</sup> population in A549, H1299, and HCC827 parental or oncosphere cells, and CD133<sup>+</sup> population in ZRLC-1 parental or oncosphere cells. The unstained control trace in blue is shown for gating.

- (B) Representative image of tumors generated in mice that were injected with cells described in Fig.1D.
- (C) ZRLC-1 parental or oncosphere cells were separately injected subcutaneously into NOD/SCID mice. Data are expressed as mean  $\pm$  SEM of n=3 mice per group. \* $p < 0.05$ , NS no significance. Tumor incidence is displayed on the graph.
- (D) Representative image of tumors generated in mice that were injected with cells described in Fig.S1C.

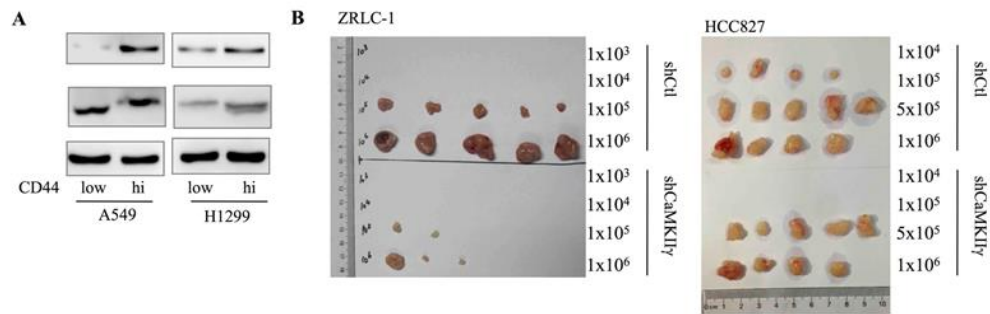

Fig.S2

- (A) Detection of activated and total CaMKII $\gamma$  protein level by western blots in sorted lung cancer cells.
- (B) Representative image of tumors generated in mice that were injected with cells described in Fig.2C.

A

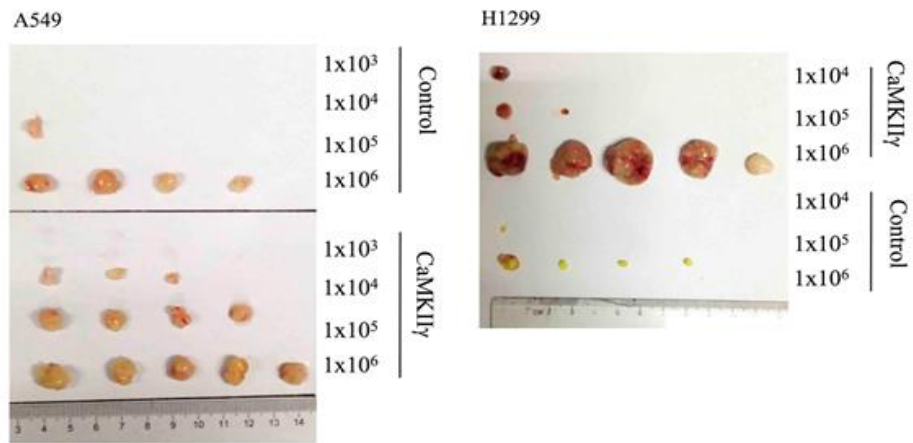

Fig. S3  
(A) Representative image of tumors generated in mice that were injected with cells described in Fig.3C.

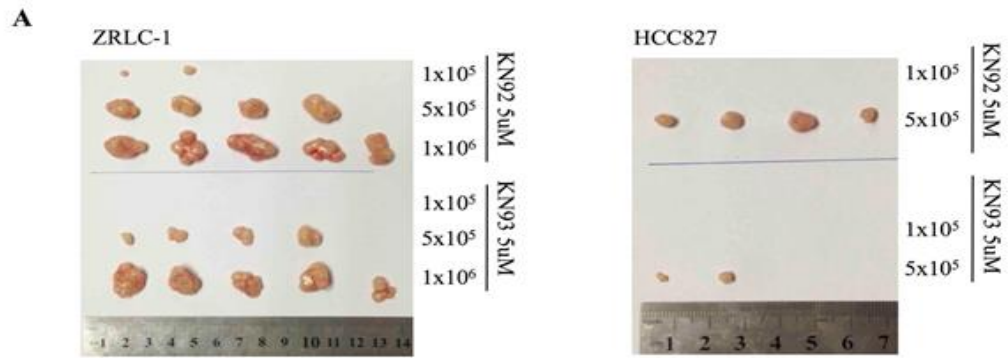

**B**

| TIC Frequency | ZRLC-1                                    | HCC827                                      |
|---------------|-------------------------------------------|---------------------------------------------|
| KN92<br>5uM   | 1/164251<br>(95%CI:<br>1/402499-1/67028)  | 1/455120<br>(95%CI:<br>1/1212669-1/170809)  |
| KN93<br>5uM   | 1/280490<br>(95%CI:<br>1/621072-1/126675) | 1/1233156<br>(95%CI:<br>1/4874891-1/121976) |

Fig. S4

(A) Representative image of tumors generated in mice that were injected with cells described in Fig.4D.

(B) TIC frequency of ZRLC-1 or HCC827 cells pre-treated with KN92 or KN93 is measured by LDA *in vivo*.

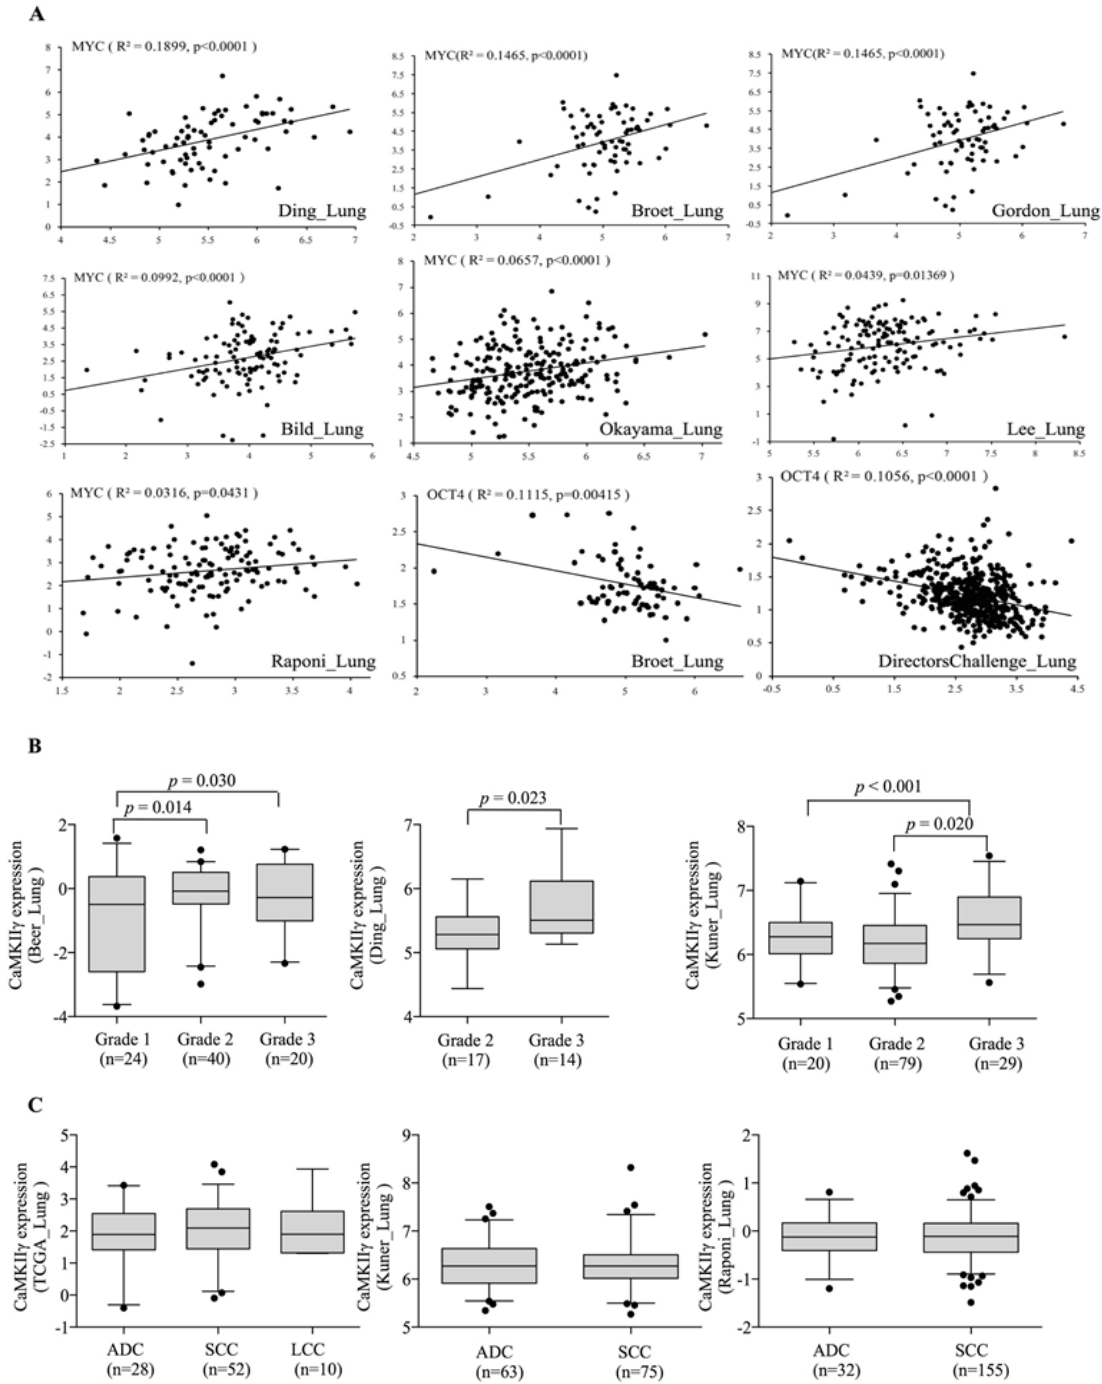

Fig.

S5

(A) Correlation between CaMKII $\gamma$  and iPSC factors (OCT4, MYC) is analyzed from Oncomine<sup>®</sup> microarray data. X axis stands for CaMKII $\gamma$  expression and Y axis stands for OCT4 or MYC expression.

(B) Correlation between CaMKII $\gamma$  expression and pathological grade is analyzed from Oncomine<sup>®</sup> microarray data.

(C) Correlation between CaMKII $\gamma$  expression and cancer type including adenocarcinoma, squamous cell carcinoma and large cell carcinoma is analyzed from Oncomine<sup>®</sup> microarray data.

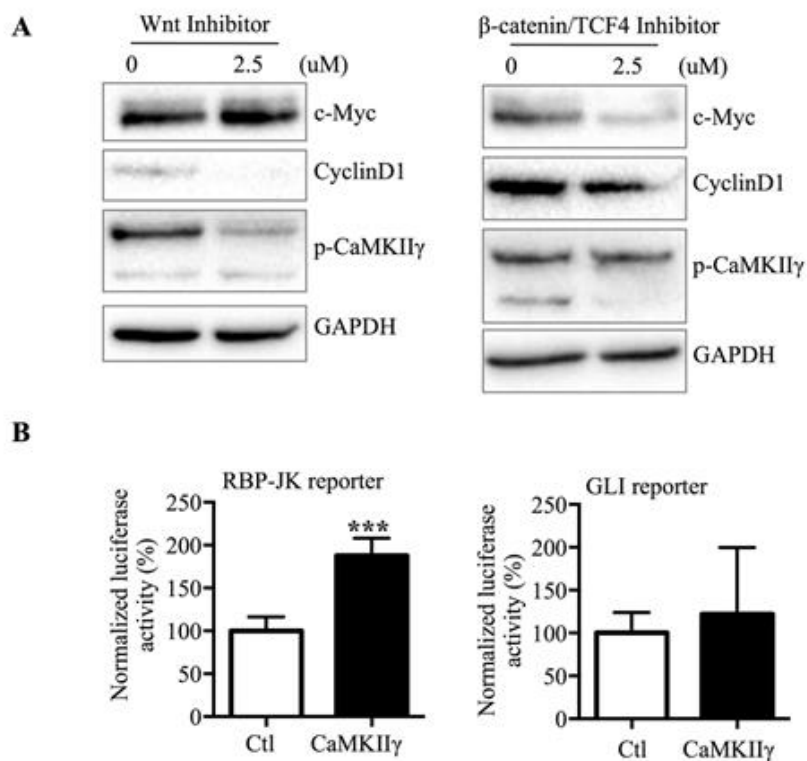

Fig. S6

(A) Detection of c-Myc, CyclinD1 and pCaMKII $\gamma$  in ZRLC-1 cells treated with Wnt or  $\beta$ -catenin inhibitor by western blots.

(B) Dual luciferase reporter assay of Notch pathway (RBP-JK) and Hedgehog pathway (GLI) in control or CaMKII $\gamma$ -overexpressed H1299 cells. Data are expressed as mean  $\pm$  SEM of  $n=4$  independent cell dishes per condition. \*\*\* $p < 0.001$ .

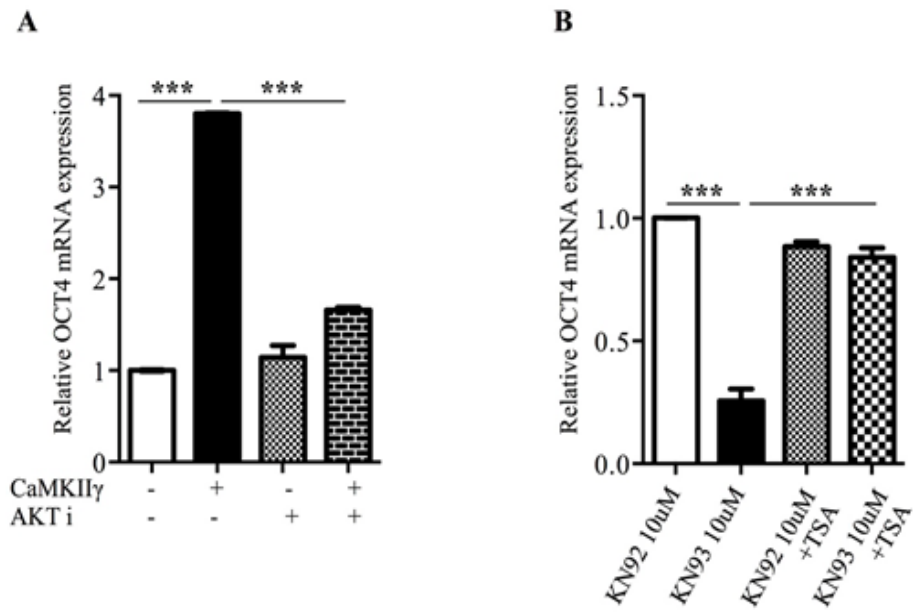

Fig. S7

- (A) Relative gene expression of OCT4 in control or CaMKII $\gamma$ -overexpressed H1299 cells treated with Akt inhibitor. Data are expressed as mean  $\pm$  SEM of  $n=3$  independent cell dishes per condition. \*\*\* $p < 0.001$ .
- (B) Relative gene expression of OCT4 in KN92- or KN93-treated ZRLC-1 cells cultured with TSA. Data are expressed as mean  $\pm$  SEM of  $n=3$  independent cell dishes per condition. \*\*\* $p < 0.001$ .

**Table S1**

| Primers for realtime PCR and CH-IP PCR |                        |                         |
|----------------------------------------|------------------------|-------------------------|
| Gene                                   | Primer-F               | Primer-R                |
| OCT4                                   | CTTGAATCCCGAATGGAAAGGG | GTGTATATCCAGGGTGATCCTC  |
| MYC                                    | GGCTCCTGGCAAAGGTCA     | CTGCGTAGTTGTGCTGATGT    |
| KLF4                                   | CCCACATGAAGCGACTTCCC   | CAGGTCCAGGAGATCGTTGAA   |
| NANOG                                  | TTGTGGGCCTGAAGAAACT    | AGGGCTGCTCTGAATAAGCAG   |
| CaMKII $\gamma$                        | ACCCGTTTCACCGACGACTA   | CTCCTGCGTGGAGGTTTTCTT   |
| GAPDH                                  | GGAGCGAGATCCCTCCAAAAT  | GGCTGTTGTCATACTTCTCATGG |
| OCT4<br>(-2000)                        | GCATTCCGTTGGCTATTCTC   | GATGTGCTTTGTTAGTGGG     |
| OCT4<br>(-1000)                        | TGTGCTTATGGCTGTTGATG   | CCACTGTGCCCTGTTAGTTT    |
| OCT4<br>(-100)                         | GCCACCACATTAGGCAAAC    | GCGAAGGGACTACTCAACCC    |
| OCT4<br>(+1000)                        | AGAAAGCGAACCAGTATCGA   | GCGCCGGTTACAGAACCACA    |
